# Supplementary material for: From colonial clusters to colonial sheaths: analysis of Microcystis morphospecies in mesocosm by imaging flow cytometry
Source: Research Square preprint supplement (doi:10.21203/rs.3.rs-3062098/v1), 2023-07-13
Supplement: Supplementary file 1 [file b3953bcbd40481a83f4fdef7.docx]

**Supplementary Data for the manuscript:**

**From colonial clusters to colonial sheaths: analysis of *Microcystis* morphospecies in mesocosm by imaging flow cytometry**

**Adina Zhumakhanova 1, Yersultan Mirasbekov 1,#, Dmitry V. Malashenkov1, Thomas A. Davidson2, Eti Ester Levi2, Erik Jeppesen2,3,4,5, Natasha S. Barteneva 1,6,***

1School of Sciences and Humanities, Nazarbayev University, Astana, Kazakhstan

2Department of Ecoscience, Aarhus University, Aarhus, Denmark

3Sino-Danish Centre for Education and Research, Beijing, China

4Limnology Laboratory, Department of Biological Sciences and Centre for Ecosystem Research and Implementation, Middle East Technical University, Ankara, Turkey,

5Institute of Marine Sciences, Middle East Technical University, Erdemli-Mersin, Turkey,

6Environment&Resource Efficiency Cluster, Nazarbayev University, Astana, Kazakhstan

#- Current affiliation: IMIM, Graduate School, Uppsala University, Sweden

***Corresponding author:** Natasha S. Barteneva; email: natalie.barteneva@nu.edu.kz;

[bartene@yahoo.com](mailto:bartene@yahoo.com)

**
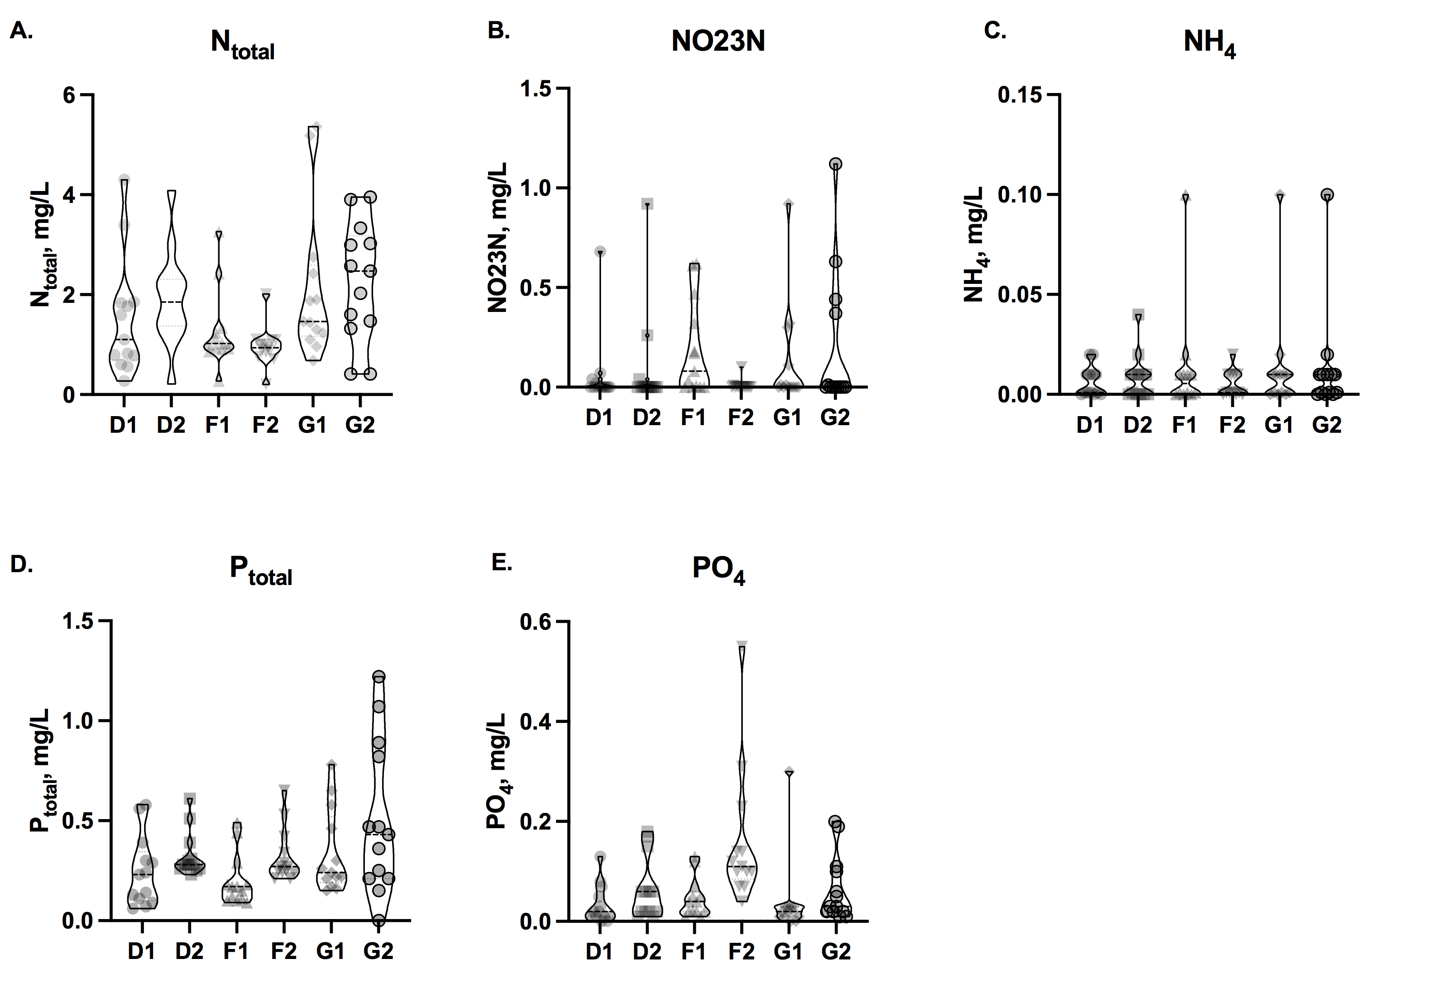
**

**Supplementary Figure 1**. Concentrations of nutrients in mesocosm tanks. **A**. Ntotal; **B.** NO2+3 N; **C.** ammonium NH4; **D**. Ptotal; **E**. orthophosphate PO4 in LMWE-2019 mesocosm tanks D1, D2, F1, F2, G1, and G2. Whiskers shows distribution of values from minimum to maximum. Dotted line represents the mean.


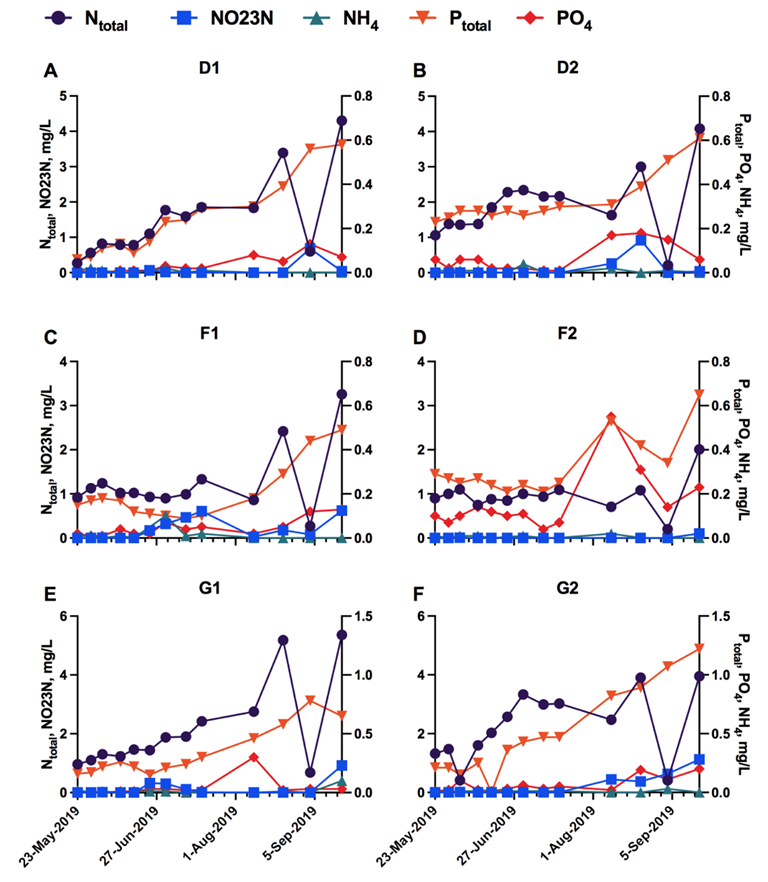


**Supplementary Figure 2**. Temporal variations of nutrients in mesocosm tanks. **A**. tank D1; **B**. tank D2; **C.** tank F1; **D.** tank F2; **E.** tank G1; **F**. tank G2. Measured concentrations of nutrients include total nitrogen (Ntotal), nitrate + nitrite (NO2+3N), ammonium (NH4), total phosphorous (Ptotal), orthophosphate (PO4). Left Y axis reflects changes in concentration of Ntotal (purple circle) and NO2+3N (blue square), whereas Right Y axis represents seasonal variations of Ptotal (orange inverted triangle), PO4 (red rhombus), and NH4 (teal triangle) concentrations.

**Supplementary Table 1**. The list of DNA sequences for each PCR product(Microcystis-specific mcyE sequences) from LMWE-2019 mesocosm samples:

| Tank | *Microcystis*-specific mcyE sequence |
| --- | --- |
| A1 | AAACGATACGCTCATACAGGCTCCAGACYTCATTAGCTTCKGAKGAGAAAAAACCTTTMGAWCCGGCGATKAGGCAGCCACTGAAGGAAGCATTGAGTTTATGGGACGAAAAGATAATCAGCAAGATGTTCATTACCGTAATAACCTGCCGAGTCTGC |
| D1 | GGTGTGCTCTACCACCCGAATGACTCAGAAATTTAAACCTAGCTTTCTTGATGAGACAAAAACTCTCTTTAGAACCGGCGATTTAGGCAAGCAAACTGCTCCCGGTATCATTGAGTTTATGGGACGAAAAGATAATCAAGTTAAGGTCAATGGTTATCGAATTGACCCCGGAGAAATTGAATATCAATTGACTCGTTATGCTCCCATTAAAAT |
| F1 | CGACATGCTCTACGACCCGAATGACTCAGAAAATTTAAACCTAGCTTTCTTGATGAGACAAAAACACTCTTTAGAACCGGCGATTTAGGCAAGCAAACTGCTCCCGGTATCATTGAGTTTATGGGACGAAAAGATAATCAAGTTAAGGTCAATGGTTATCGAATTGACCCCGGAGAAATTGAATATCAATTGACTCGTTATGCTCCCATTGA |
| G1 | GGAAGCACATACGACCCGAATGACTCAAGAAAAATTTAAACCTAGCTTTCTTGATGAGACAAAAACTCTCTTTAGAACCGGCGATTTAGGCAAGCAAACTGCTCCCGGTATCATTGAGTTTATGGGACGAAAAGATAATCAAGTTAAGGTCAATGGTTATCGAATTGACCCCGGAGAAATTGAATATCAATTGACTCGTTATGCTCCCATTGA |
| A2 | GTGCTCGATGCGCTCTCTCATCCTTGAGTCACTATTAGTTTCTCCAATGGTATATCAAATCCTTGGATAAAAAGACAGTACAAATTGTATTGCTATTACTTTTAGTGACTGTATTGCAATTTTTTAGAAATCCAAAGAGACCTTTAGAAGTAAACGATTACAATATCATTGCTCCAGTAGATGGAAAAGTGGTAGTAATTGAAGAAGTTTTTGAACCTGAATATTTTAAAGACCAACGTTTACAAGTTTCTATCTTTATGTCGCCAATAAATGTACACGTAACTCGTTATGCTCCCATTGA |
| D2 | CAAATCCTCTTGCCACCCGAATGACTCAGAGAATTTAAACCTAGCTTTCTTGATGAGACAAAAACTCTCTTTAGAACCGGCGATTTAGGCAAGCAAACTGCTCCCGGTATCATTGAGTTTATGGGACGAAAAGATAATCAAGTTAAGGTCAATGGTTATCGAATTGACCCCGGAGAAATTGAATATCAATTGACTCGTTATGCTCCCATTGATAA |
| F2 | no data |
| G2 | ACGATGATCGCACTAGAGACCATATGATCGAGAAACTTTACACTTAGCTTTCTTAGATGAGACAAAGGCACGTGAGAACCGGCGATTTAGGAAGCAAACTGCTCCCGGAAACATTGAGTTTATGGGACGAAAAGATAATCAAGTTAAGGTCAATGGTTATCGAATTGACCCCGGAAATTGAAAAATTGTTCGTTGTCCTTGA |

**Supplementary Table 2.** Alignment matches of mesocosm samples with NCBI Nucleotide collection database.

| Sample-target names | Size (bp) | Description of the best match | Max Score | E-value | Percent identity |
| --- | --- | --- | --- | --- | --- |
| A1-mcyE | 158 | Uncultured *Microcystis* sp. microcystin synthetase E (mcyE) gene, partial cds | 58.4 | 4e-04 | 100% |
| D1-mcyE | 213 | *Microcystis* *aeruginosa* FCY-26 McyE (mcyE) gene, complete cds | 344 | 4e-90 | 97.10% |
| F1-mcyE | 212 | *Microcystis* *aeruginosa* FCY-26 McyE (mcyE) gene, complete cds | 346 | 1e-90 | 98.01% |
| G1-mcyE | 213 | *Microcystis* *aeruginosa* FCY-26 McyE (mcyE) gene, partial cds | 364 | 3e-96 | 99.50% |
| A2-mcyE | 301 | *Flavobacterium haoranii* strain KCTC 23008 chromosome, complete genome | 159 | 2e-34 | 81.96% |
| D2-mcyE | 215 | *Microcystis* *aeruginosa* FCY-26 McyE (mcyE) gene, complete cds | 346 | 1e-90 | 98.01% |
| F2-mcyE | no data | | | | |
| G2-mcyE | 202 | *Microcystis* *aeruginosa* FCY-26 McyE (mcyE) gene, complete cds | 195 | 4e-45 | 88.55% |
